# Supplementary material for: A facile method to evaluate the influence of trap densities on perovskite solar cell performance
Source: Royal Society of Chemistry journal article supplement (doi:10.1039/c9tc00816k), 2019-01-01
Supplement: c9tc00816k1.pdf [file c9tc00816k1.pdf]

## Supporting Information

### A facile method to evaluate the influence of trap densities on perovskite solar cell performance

*Bingbing Chen, Hongwei Hu, Teddy Salim, and Yeng Ming Lam\**

School of Materials Science and Engineering, Nanyang Technological University, 50 Nanyang Avenue, Singapore 639798, Singapore

Corresponding Author

\*E-mail: [ymlam@ntu.edu.sg](mailto:ymlam@ntu.edu.sg)

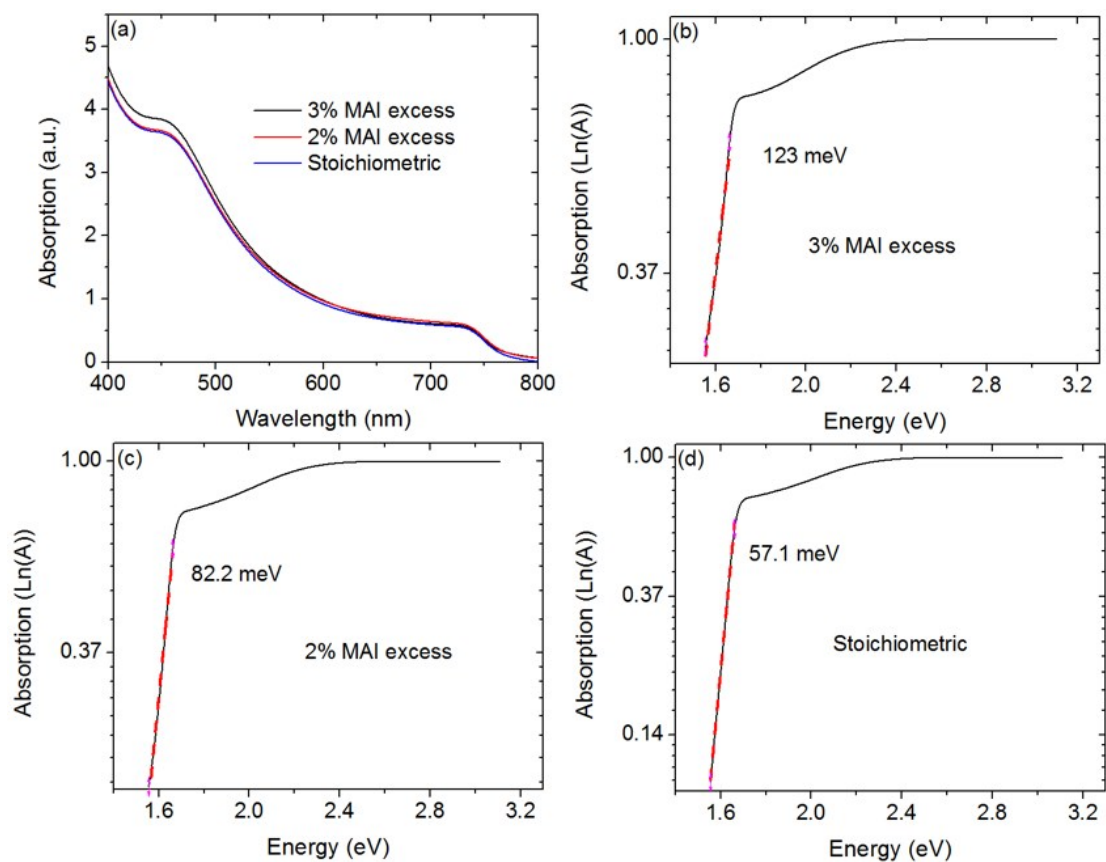

Figure S1. UV-Vis absorption spectra and plot of  $\ln(A)$  vs  $E(=h\nu)$  used to extract the Urbach energy of MAPbI<sub>3</sub> perovskite films prepared by using MAI-excess and stoichiometric precursor solutions: (a) absorption spectra; (b) 3% MAI-excess; (c) 2% MAI-excess; (d) stoichiometric.

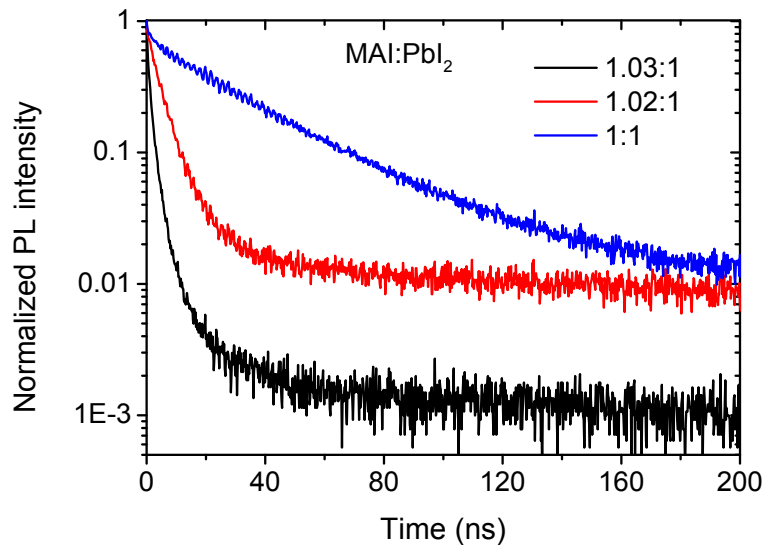

Figure S2. Time-resolved PL decay spectra of MAPbI<sub>3</sub> perovskite films prepared using precursors with different molar ratio of MAI and PbI<sub>2</sub>

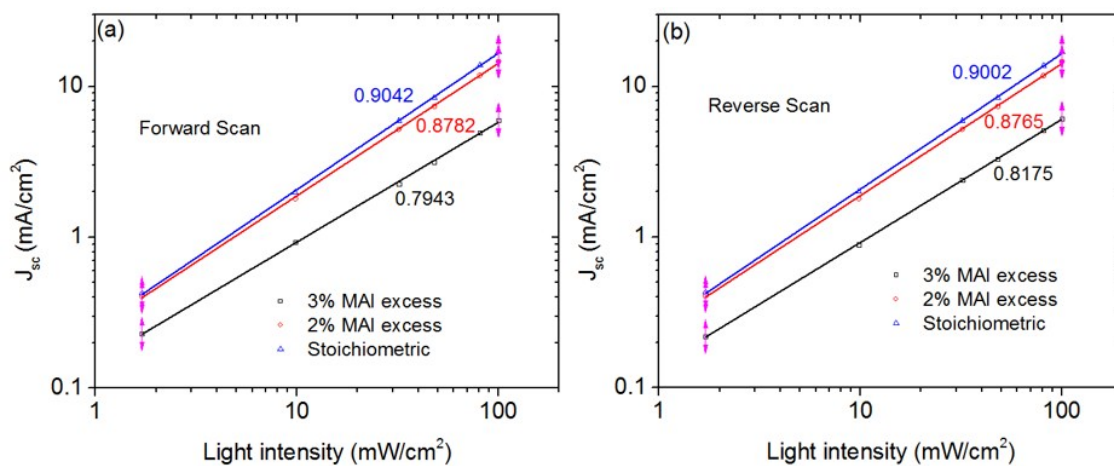

Figure S3. Light intensity-dependent  $J_{sc}$  for perovskite solar cells fabricated using MAI-excess and stoichiometric precursor solutions measured from short-circuit to open-circuit (FS) and open-circuit to short-circuit (RS) directions.

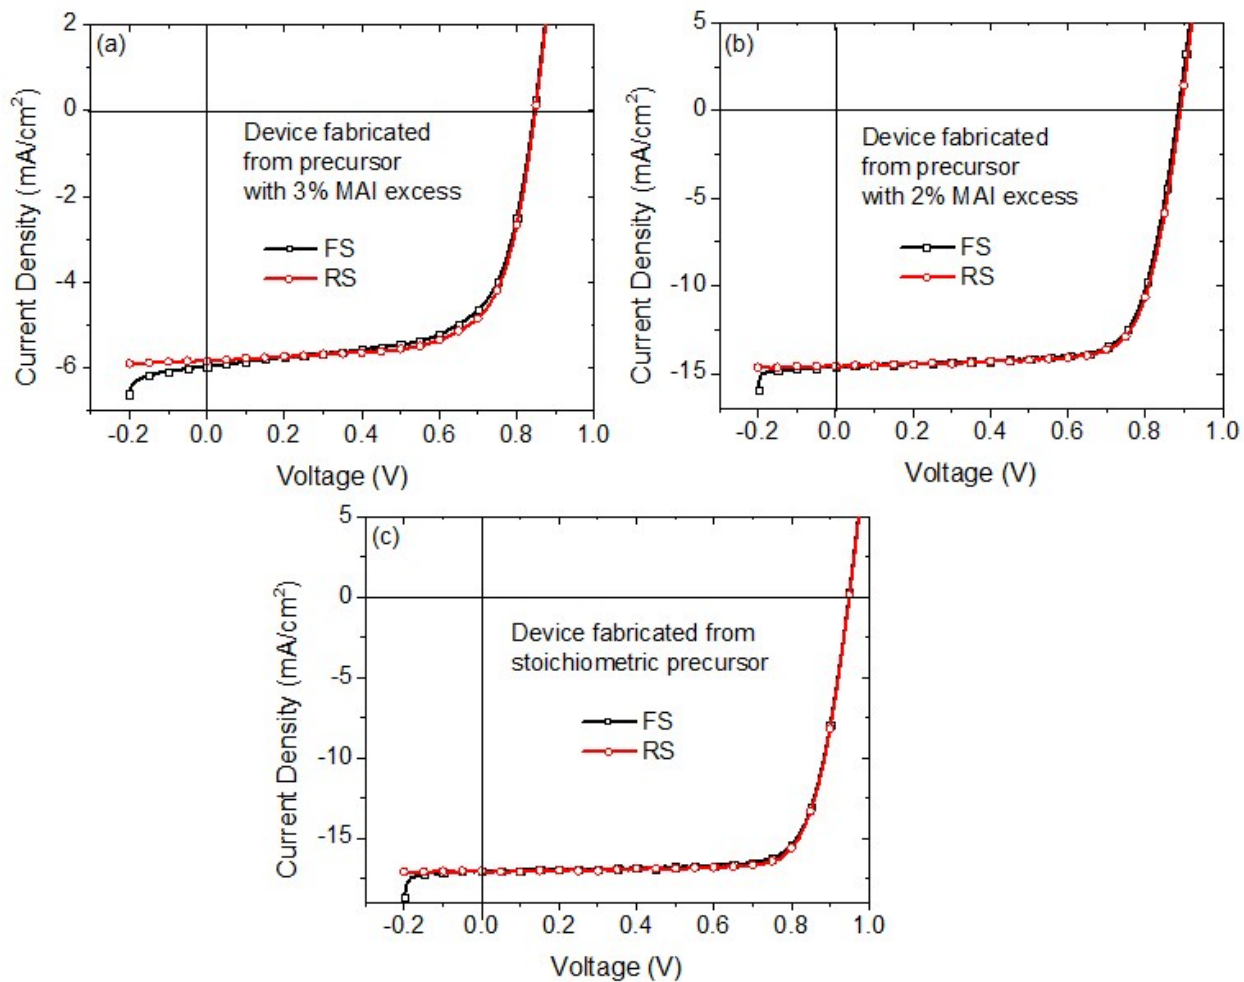

Figure S4. Reverse and forward scanning  $J-V$  curves of MAPbI<sub>3</sub> perovskite solar cells fabricated using MAI-excess and stoichiometric precursor solutions under one sun illumination: (a) 3% MAI excess; (b) 2% MAI excess; (c) stoichiometric.

Table S1 Device parameters of MAPbI<sub>3</sub> perovskite solar cells with different grain sizes under one sun illumination

| Ratio of MAI and PbI <sub>2</sub> |    | V <sub>oc</sub> (V) | J <sub>sc</sub> (mA/cm <sup>2</sup> ) | FF (%) | PCE (%) | R <sub>s</sub> (Ω·cm <sup>2</sup> ) | Hysteresis Index (HI) (%) |
|-----------------------------------|----|---------------------|---------------------------------------|--------|---------|-------------------------------------|---------------------------|
| 1.03:1                            | FS | 0.846               | 5.97                                  | 0.648  | 3.27    | 15.7                                | 1.37                      |
|                                   | RS | 0.848               | 5.84                                  | 0.688  | 3.34    | 14.2                                |                           |
| 1.02:1                            | FS | 0.885               | 14.62                                 | 0.739  | 9.56    | 6.28                                | 1.02                      |
|                                   | RS | 0.891               | 14.56                                 | 0.747  | 9.68    | 6.22                                |                           |
| 1:1                               | FS | 0.948               | 17                                    | 0.77   | 12.37   | 5.14                                | 0.67                      |
|                                   | RS | 0.949               | 17.04                                 | 0.779  | 12.53   | 5.24                                |                           |

$$Hysteresis\ Index\ (HI) = \frac{\int_{SC}^{OC} (J_{RS}(V) - J_{FS}(V)) dV}{\int_{SC}^{OC} J_{RS}(V) dV}$$

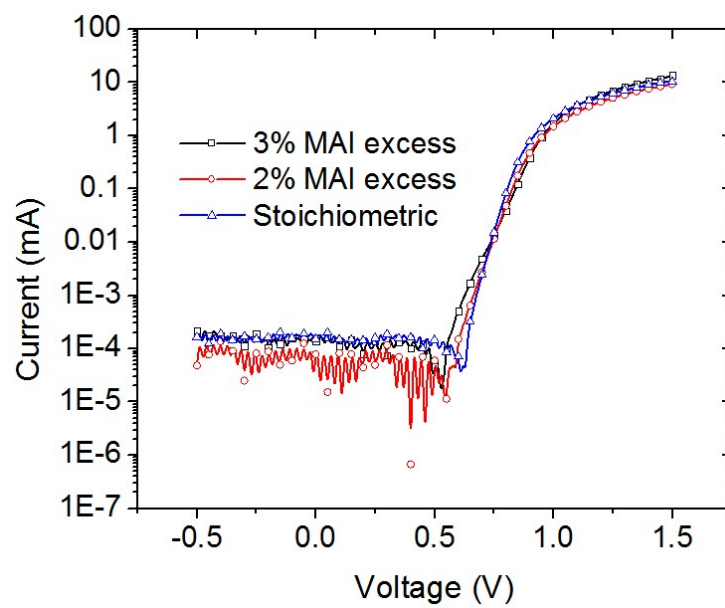

Figure S5. The current-voltage characteristics of the MAI-excess and stoichiometric perovskite solar cells measured under dark.

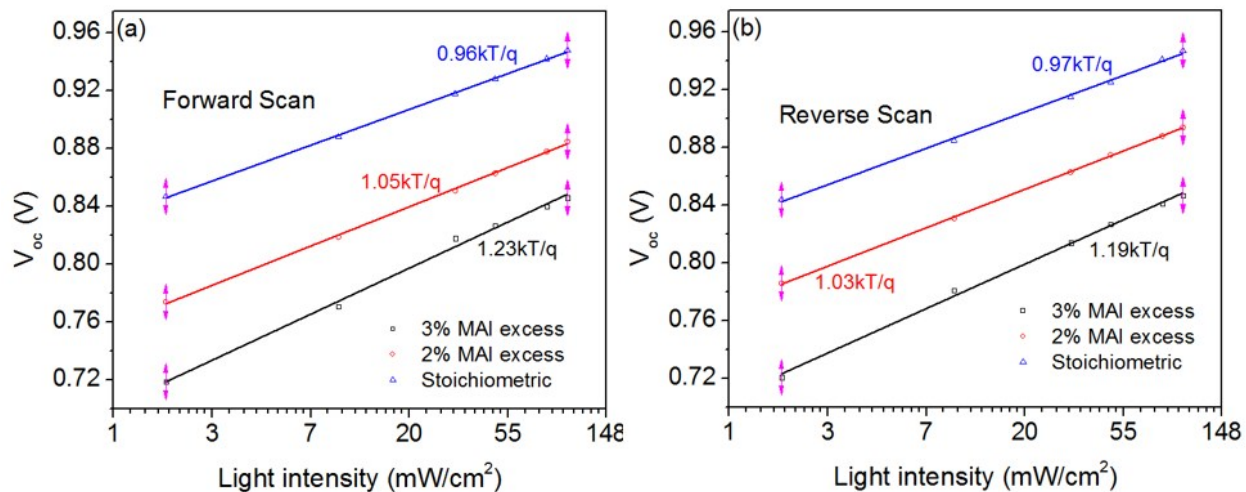

Figure S6. Light intensity-dependent  $V_{oc}$  for perovskite solar cells fabricated using MAI-excess and stoichiometric precursor solutions measured from short-circuit to open-circuit (FS) and open-circuit to short-circuit (RS) directions.
